# Supplementary material for: Metabolomic profiling of dried blood spots reveals gender-specific discriminant models for the diagnosis of small cell lung cancer
Source: PubMed Central journal article supplement (PMC6977651; doi:10.18632/aging.102670), 2020-01-12
Supplement: aging-12-102670-s001..pdf [file aging-12-102670-s001..pdf]

## SUPPLEMENTARY TABLES

**Supplementary Table 1. The characteristics of the subjects in the validation cohort.**

| Variables               | Control    | NSCLC      | SCLC       | P value |
|-------------------------|------------|------------|------------|---------|
| N                       | 27         | 20         | 31         | NA      |
| Age                     | 61.5 ± 5.4 | 62.1 ± 4.3 | 62.9 ± 6.1 | 0.62    |
| Male (%)                | 13 (48.2%) | 12 (60%)   | 15 (48.4%) | 0.61    |
| Smoking Status (%)      |            |            |            |         |
| Never                   | 13 (48.1%) | 9 (45.0%)  | 14 (45.2%) | 0.99    |
| Former                  | 2 (7.4%)   | 3 (15.1%)  | 4 (10.1%)  | 0.72    |
| Current                 | 12 (44.4%) | 8 (40.0%)  | 13 (41.9%) | 0.99    |
| Alcohol drinking status |            |            |            |         |
| Never                   | 15 (55.6%) | 12 (60.0%) | 16 (51.6%) | 0.99    |
| Former                  | 3 (11.1%)  | 2 (10.0%)  | 4 (12.3%)  | 0.99    |
| Current                 | 9 (33.3%)  | 6 (30.0%)  | 11 (35.5%) | 0.99    |

Abbreviations: SCLC = small cell lung cancer; NSCLC = non-small cell lung cancer.

**Supplementary Table 2. The biochemical pathways, VIP scores, k-mean cluster and LASSO frequency of the selected 5 diagnostic metabolites for SCLC in males.**

| Metabolites           | Biochemical pathways       | VIP scores in the PLS-DA model | K-means clusters | Frequencies using LASSO modeling |
|-----------------------|----------------------------|--------------------------------|------------------|----------------------------------|
| PI(18:0/18:0)         | Phospholipids metabolism   | 3.13                           | 2                | 70%                              |
| Cer(d18:1/22:0 OH)    | Sphingolipids metabolism   | 2.81                           | 5                | 70%                              |
| Cholic acid           | Bile acids metabolism      | 2.59                           | 3                | 70%                              |
| 2-arachidonylglycerol | Endocannabinoid metabolism | 2.57                           | 4                | 70%                              |
| IMP                   | Purine metabolism          | 2.11                           | 2                | 70%                              |

Abbreviations: IMP = inosine monophosphate; Cer = Ceramide; PI = Phosphatidylinositol; LASSO = least absolute shrinkage and selection operator; PLS-DA = partial least square discriminant analysis; SCLC = small cell lung cancer; VIP = variance in projection.

**Supplementary Table 3. The biochemical pathways, VIP scores, k-mean cluster and LASSO frequency of the selected 5 diagnostic metabolites for SCLC in females.**

| Metabolites                  | Biochemical pathways     | VIP scores in the PLS-DA model | K-means clusters | Frequencies using LASSO modeling |
|------------------------------|--------------------------|--------------------------------|------------------|----------------------------------|
| PE(18:1/20:4)                | Phospholipids metabolism | 2.87                           | 5                | 64%                              |
| 5-Methyltetrahydrofolic acid | One-carbon metabolism    | 2.85                           | 3                | 64%                              |
| Desmosterol                  | Steroid metabolism       | 2.36                           | 2                | 60%                              |
| 4,5-Dihydroorotic acid       | Pyrimidine metabolism    | 2.12                           | 1                | 60%                              |
| 9-HETE                       | Eicosanoid metabolism    | 2.64                           | 4                | 60%                              |

Abbreviations: 9-HETE = 9-hydroxyeicosatetraenoic acid; LASSO = least absolute shrinkage and selection operator; PE = phosphatidylethanolamine; PLS-DA = partial least square discriminant analysis; SCLC = small cell lung cancer; VIP = variance in projection.

**Supplementary Table 4. The multinomial logistic regression analysis of the 5 diagnostic metabolites for SCLC in males.**

| Metabolites         | Multinomial logistic regression coefficients | P value | Odds ratio for SCLC (95% CI) |
|---------------------|----------------------------------------------|---------|------------------------------|
| 2-AG                | 0.18                                         | 0.041   | 1.19 (1.01 - 1.37)           |
| Cholic acid         | 0.91                                         | 0.006   | 2.48 (2.19 - 2.76)           |
| PI (18:0/18:0)      | 0.51                                         | 0.01    | 1.61 (1.13 - 1.85)           |
| IMP                 | 0.23                                         | 0.034   | 1.26 (1.06 - 1.89)           |
| Cer (d18:1/22:0 OH) | 0.47                                         | 0.025   | 1.59 (1.41 - 1.78)           |

Abbreviations: 2-AG = 2-arachidonylglycerol; PI = Phosphatidylinositol; IMP = inosine monophosphate; Cer = Ceramide; SCLC = small cell lung cancer; CI = confidence interval.

**Supplementary Table 5. The multinomial logistic regression analysis of the 5 diagnostic metabolites for SCLC in females.**

| Metabolites                  | Multinomial logistic regression coefficients | P value | Odds ratio for SCLC (95% CI) |
|------------------------------|----------------------------------------------|---------|------------------------------|
| PE (18:1/20:4)               | 0.85                                         | 0.017   | 2.34 (2.19 - 2.48)           |
| 5-Methyltetrahydrofolic acid | 0.33                                         | 0.035   | 1.39 (1.11 - 1.67)           |
| Desmosterol                  | 1.21                                         | 0.002   | 3.35 (3.06 - 3.63)           |
| 4, 5-Dihydroorotic acid      | 0.95                                         | 0.005   | 2.59 (2.31 - 2.87)           |
| 9-HETE                       | 0.45                                         | 0.031   | 1.56 (1.27 - 1.84)           |

Abbreviations: CI = confidence interval; SCLC = small cell lung cancer; PE = phosphatidylethanolamine; 9-HETE = 9-Hydroxyeicosatetraenoic acid.

**Supplementary Table 6. The validation of the developed discriminant models using another independent cohort.**

| Gender | Discriminant models                                                                         | Accuracy (%) (95% CI) | Sensitivity (%) (95% CI) | Specificity (%) (95% CI) | Positive predictive value (95% CI) | Negative predictive value (95% CI) |
|--------|---------------------------------------------------------------------------------------------|-----------------------|--------------------------|--------------------------|------------------------------------|------------------------------------|
| Male   | PI(18:0/18:0), Cer(d18:1/22:0 OH), 2-Arachidonylglycerol, IMP and Cholic acid               | 91.3 (74.1-97.1)      | 86.6 (59.5-98.3)         | 84.1 (63.9-95.5)         | 76.5 (56.4-89.1)                   | 91.3 (74.4-97.5)                   |
| Female | PE(18:1/20:4), 5-Methyltetrahydrofolic acid, Desmosterol, 4,5-Dihydroorotic acid and 9-HETE | 81.3 (54.4-95.9)      | 86.4 (65.1-97.1)         | 84.2 (68.8-93.4)         | 81.3 (59.6-92.7)                   | 86.4 (69.3-94.7)                   |

Abbreviations: 9-HETE = 9-hydroxyeicosatetraenoic acid; Cer = Ceramide; PI = Phosphatidylinositol; CI = confidence interval; IMP = inosine monophosphate; PE = phosphatidylethanolamine.
